# Supplementary material for: VRK1 Depletion Facilitates the Synthetic Lethality of Temozolomide and Olaparib in Glioblastoma Cells
Source: Frontiers journal article supplement (doi:10.3389/fcell.2021.683038), 2021-06-14
Supplement: Data_Sheet_6.PDF [file Data_Sheet_6.PDF]

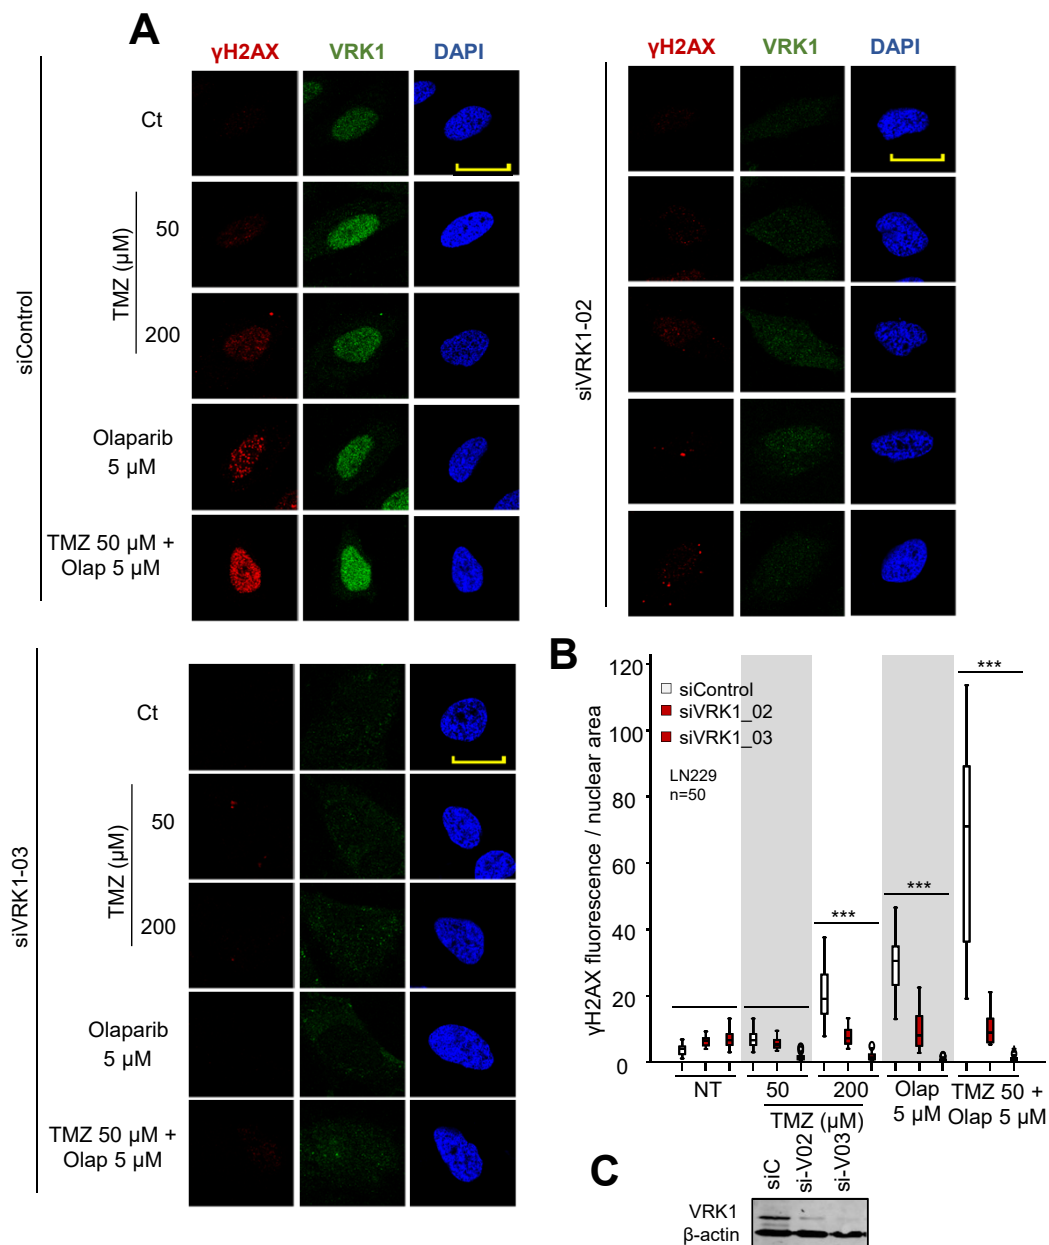

**Figure S6.** Effect of VRK1 knockdown on  $\gamma$ H2AX foci formation after TMZ and olaparib treatments in LN-229. **A.** Left. Effect of siControl on  $\gamma$ H2AX foci formation induced by TMZ, olaparib and their combination. **A.** Right and down. Effect of siVRK1-02 and siVRK1-03 on  $\gamma$ H2AX foci formation induced by TMZ, olaparib and their combination. Scale bar= 15  $\mu$ m. **B.** Quantification of the effect of VRK1 depletion on  $\gamma$ H2AX fluorescence per nuclear area. Fifty cells per condition were quantified. \*\*\* $P < 0.001$ . **C.** Western blot showing the effect of VRK1 depletion in cell extracts.  $\beta$ -actin was used as load control.
