# Supplementary material for: VRK1 Depletion Facilitates the Synthetic Lethality of Temozolomide and Olaparib in Glioblastoma Cells
Source: PubMed Central journal article supplement (PMC8237761; doi:10.3389/fcell.2021.683038), 2021-06-14
Supplement: Data_Sheet_7.pdf [file Data_Sheet_7.pdf]

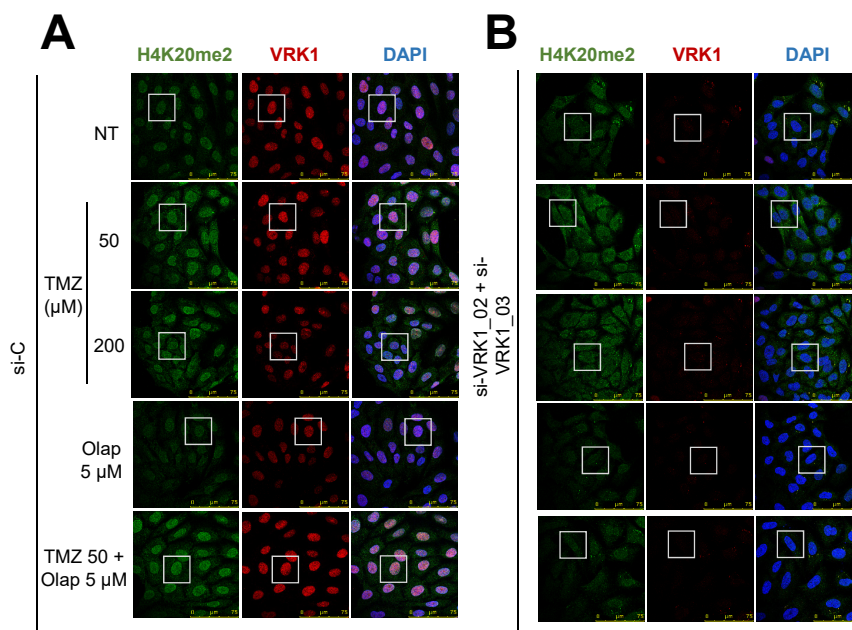

**Figure S7.** Effect of VRK1 knockdown on H4K20me2 induced by TMZ and olaparib in LN-18. **A.** Effect of siControl on H4K20me2c induced by TMZ, olaparib and the combination of both drugs shown by IF. **B.** Effect of siVRK1-02 and siVRK1-03 on H4K20me2 induced by TMZ, olaparib and their combination shown by IF. NT: no treatment. Field images from Figure 4. Squares indicate the cells shown in Figure 4.
